# Supplementary material for: In Situ Growth of Sodium Manganese Hexacyanoferrate on Carbon Nanotubes for High-Performance Sodium-Ion Batteries
Source: MDPI journal article supplement (doi:10.3390/molecules29020313), 2024-01-08
Supplement: s1 [file s1]

## Supporting information

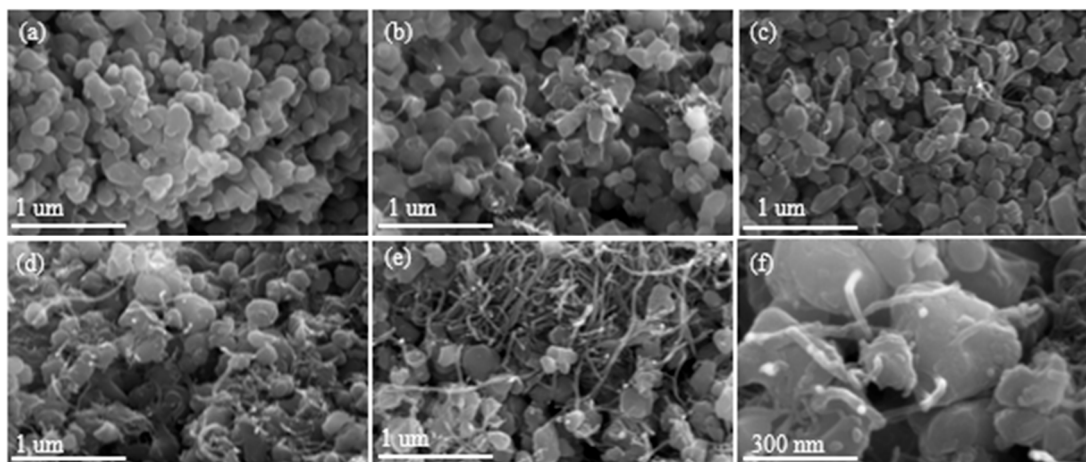

**Figure S1.** SEM images of (a) NaMnHCF, (b) NaMnHCF@2%CNT, (c) NaMnHCF@5%CNT, (d,f) NaMnHCF@10%CNT, (e) the sample NaMnHCF/CNT composite prepared by mechanical grinding.

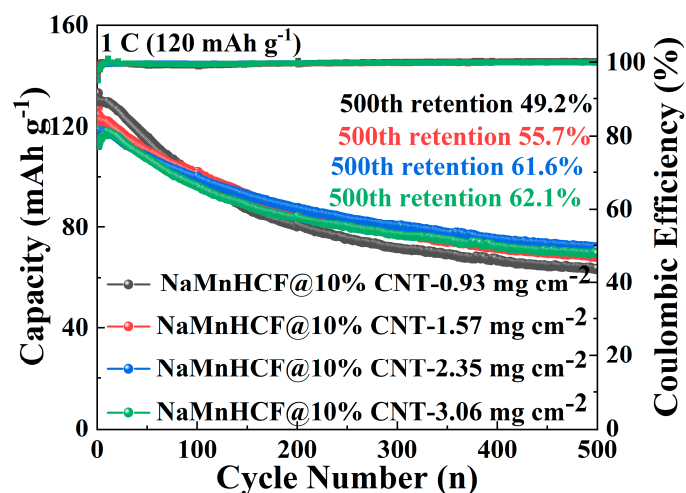

**Figure S2.** Cycling performance of NaMnHCF@10%CNT electrode at different mass loadings.

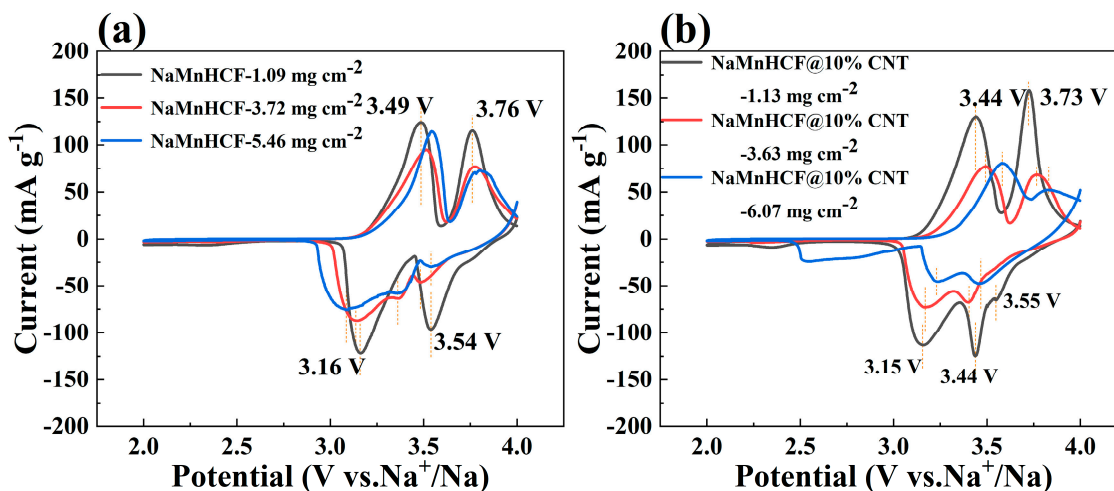

**Figure S3.** CV curves at 0.1 mV s<sup>-1</sup> in the first cycle: (a) NaMnHCF, (b) NaMnHCF@10%CNT.

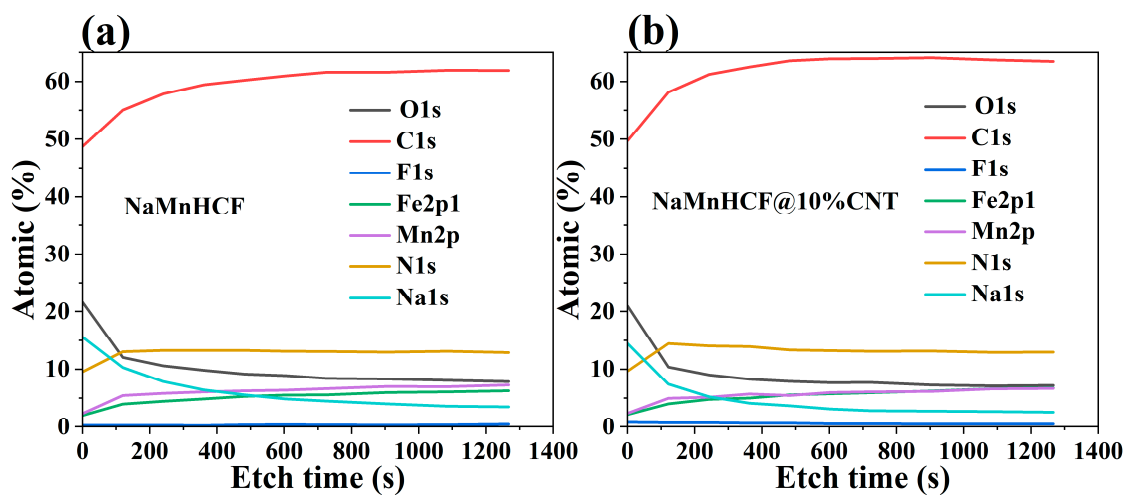

Figure S4. XPS depth profiling of pristine materials: (a) NaMnHCF, (b) NaMnHCF@10%CNT.

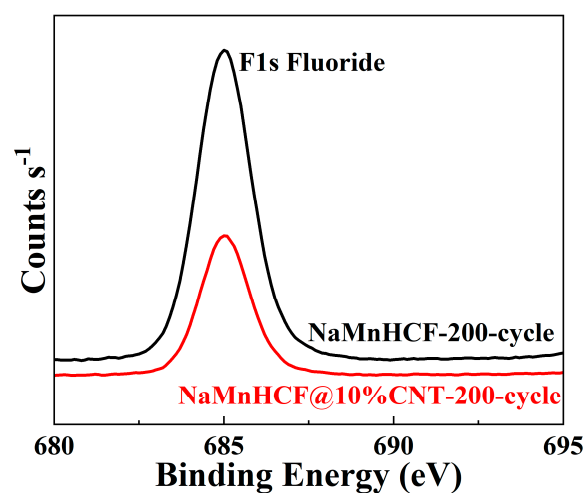

Figure S5. XPS spectrometry of F1s of 200-cycle materials.

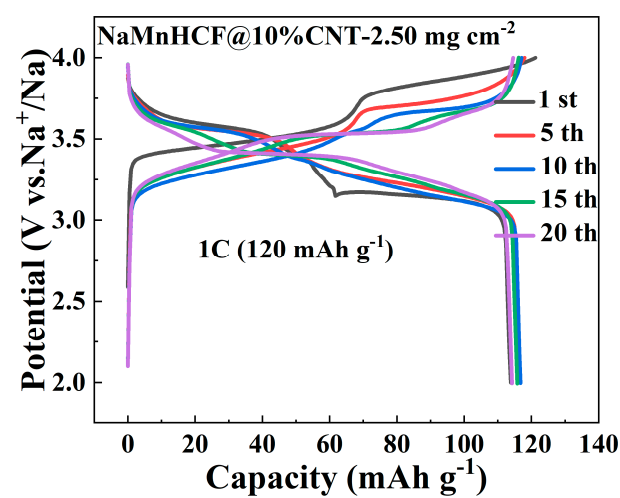

Figure S6. Charging and discharging plots of NaMnHCF@10% electrode in the different cycle.

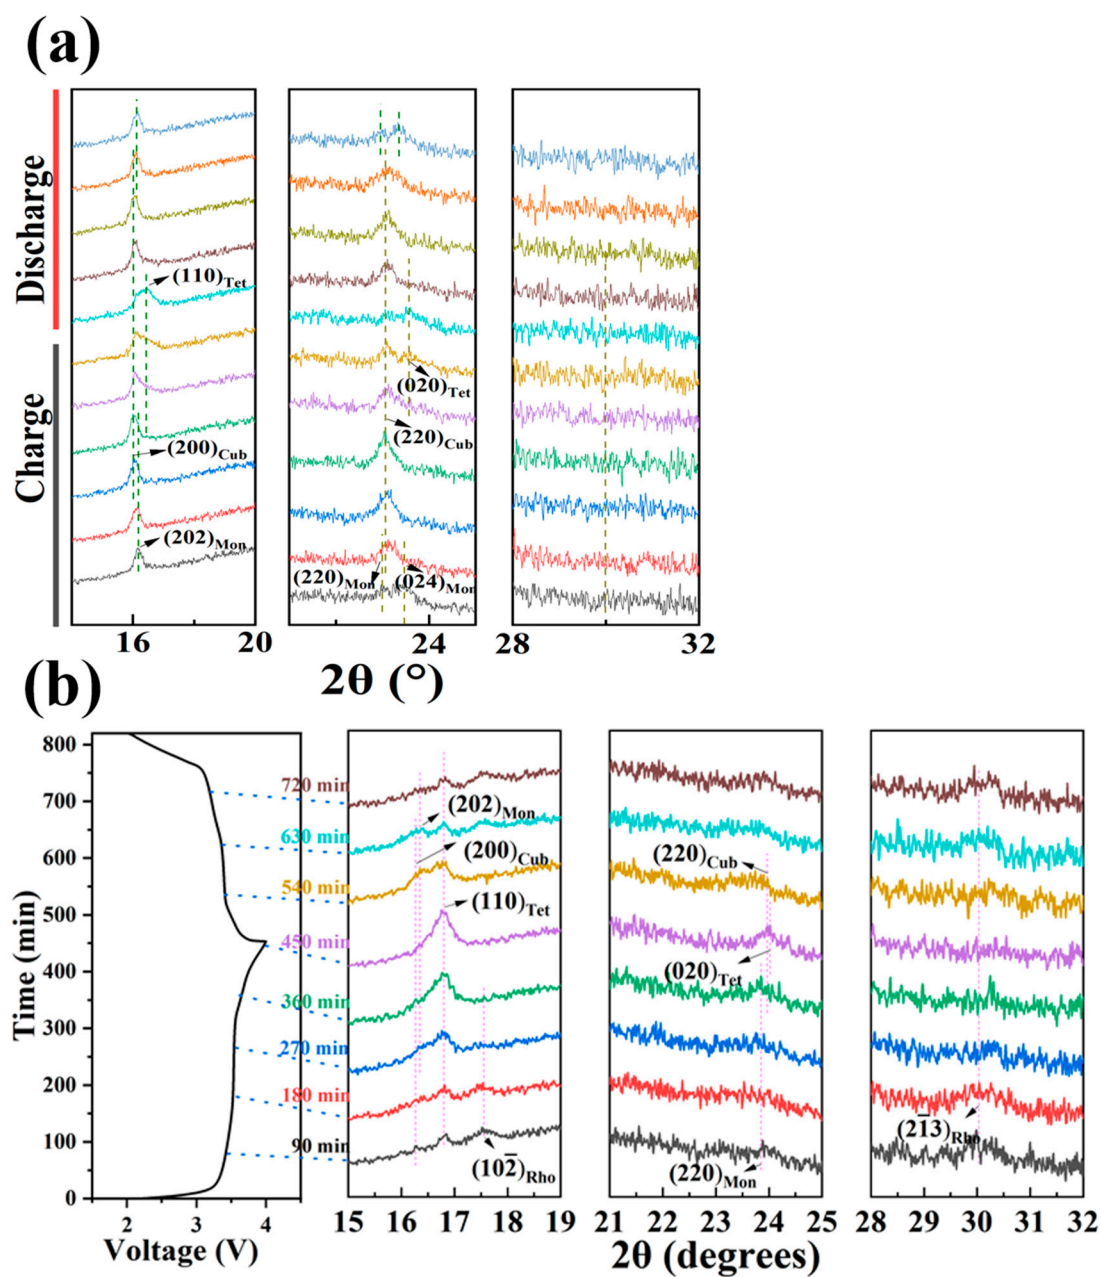

**Figure S7.** (a) The enlargement of in situ XRD pattern in a narrow  $2\theta$  range of 15°–19°, 21°–25°, 28°–32°, showing the phases present during the structural evolution of the normal monoclinic crystal materials in the 1st cycle, (b) The enlargement of in situ XRD pattern in a narrow  $2\theta$  range of 15°–19°, 21°–25°, 28°–32°, the time interval of each pattern is 90 mins, showing the coexistence of monoclinic and rhombohedral phases and their structural evolution in the 13th cycle.

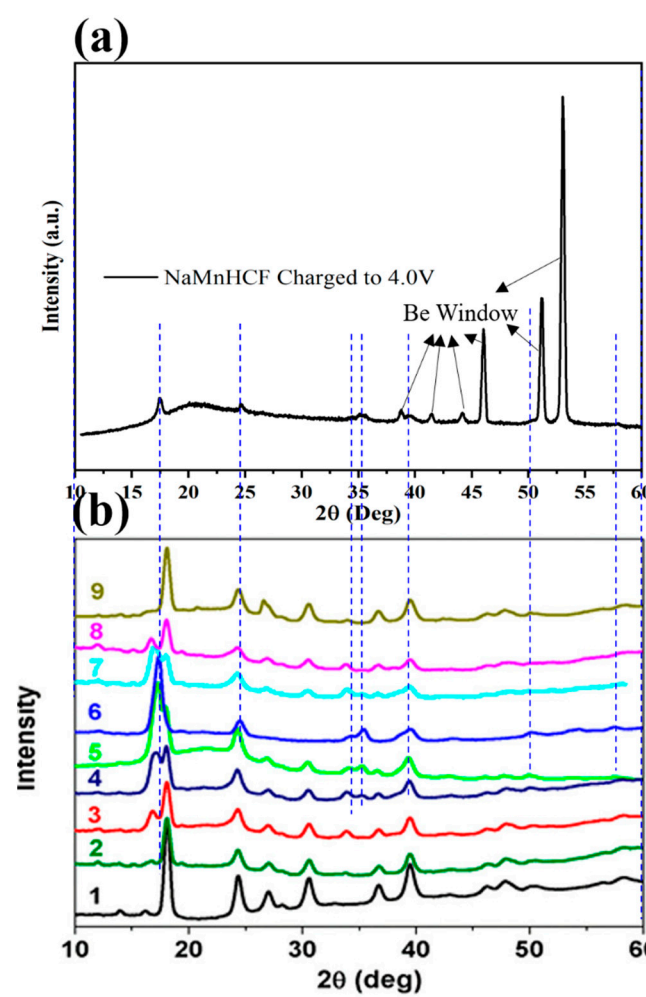

**Figure S8.** (a) the XRD pattern of fully charged monoclinic NaMnHCF, (b) the in situ XRD pattern of rhombohedral NaMnHCF reported by Goodenough et al. [1] Copyright 2015 American Chemical Society.

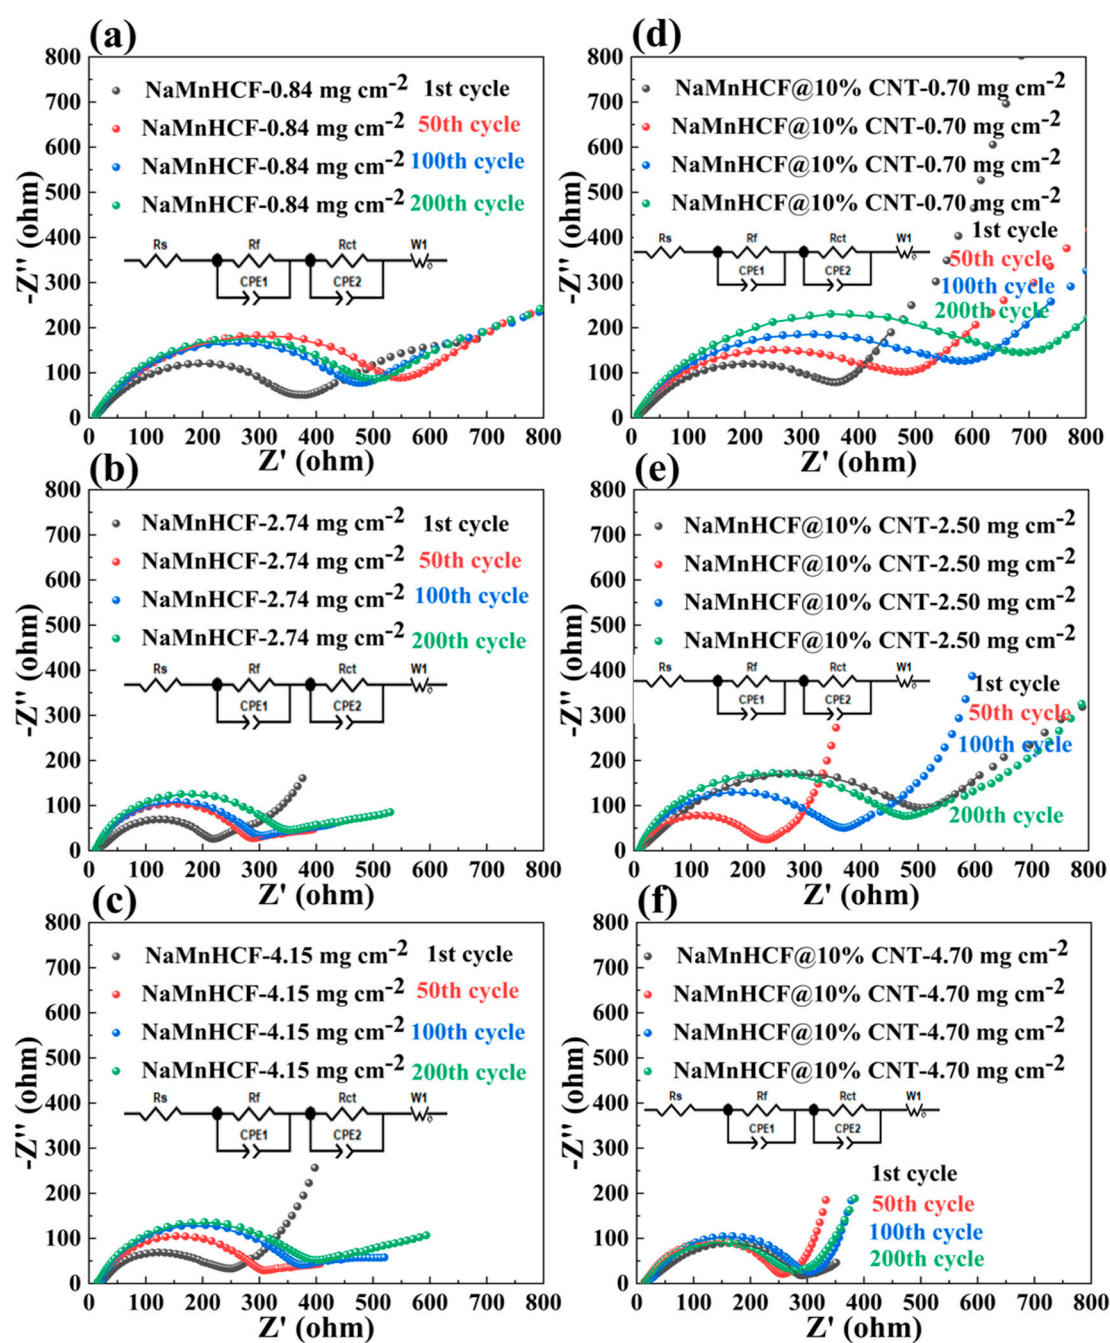

**Figure S9.** EIS spectra of the samples: (a) NaMnHCF low mass loading, (b) NaMnHCF medium mass loading, (c) NaMnHCF high mass loading, (d) NaMnHCF@10%CNT low mass loading, (e) NaMnHCF@10%CNT medium mass loading, (f) NaMnHCF@10%CNT high mass loading.



Table S1. Results of EIS fitting.

| Denotation                          | Cycle | $R_s$ | $R_f$ | $R_{ct}$ | $R_{ct}$ | $R_f$ | $R_s$ | Cycle | Denotation                                     |
|-------------------------------------|-------|-------|-------|----------|----------|-------|-------|-------|------------------------------------------------|
| NaMnHCF—0.84<br>$\text{mg cm}^{-2}$ | 1st   | 8.3   | 118.7 | 192.1    | 10.3     | 340.3 | 10.2  | 1st   | NaMnHCF<br>@10%CNT—0.70<br>$\text{mg cm}^{-2}$ |
|                                     | 50th  | 8.7   | 158.6 | 315.9    | 242.1    | 203.9 | 8.3   | 50th  |                                                |
|                                     | 100th | 8.9   | 223.1 | 190.2    | 192.2    | 347.9 | 8.2   | 100th |                                                |
|                                     | 200th | 8.1   | 117.5 | 294.9    | 39.7     | 596   | 8.3   | 200th |                                                |
| NaMnHCF—2.74<br>$\text{mg cm}^{-2}$ | 1st   | 10.1  | 180.2 | 17.59    | 55.6     | 411.3 | 8.9   | 1st   | NaMnHCF<br>@10%CNT—2.50<br>$\text{mg cm}^{-2}$ |
|                                     | 50th  | 11.5  | 251.4 | 1.164    | 0.008    | 86.1  | 9.6   | 50th  |                                                |
|                                     | 100th | 11.2  | 262.2 | 0.802    | 55.8     | 285   | 9.7   | 100th |                                                |
|                                     | 200th | 10.5  | 301   | 0.685    | 417      | 440.9 | 9.5   | 200th |                                                |
| NaMnHCF—4.54<br>$\text{mg cm}^{-2}$ | 1st   | 15.8  | 179.6 | 3.3      | 71.2     | 212.8 | 4.1   | 1st   | NaMnHCF<br>@10%CNT—4.70<br>$\text{mg cm}^{-2}$ |
|                                     | 50th  | 16.4  | 258.5 | 2.6      | 10.3     | 219.8 | 11.8  | 50th  |                                                |
|                                     | 100th | 16.9  | 319   | 2.2      | 8.6      | 257.3 | 17.1  | 100th |                                                |
|                                     | 200th | 13.5  | 334.6 | 1.6      | 3.2      | 224.4 | 11.9  | 200th |                                                |

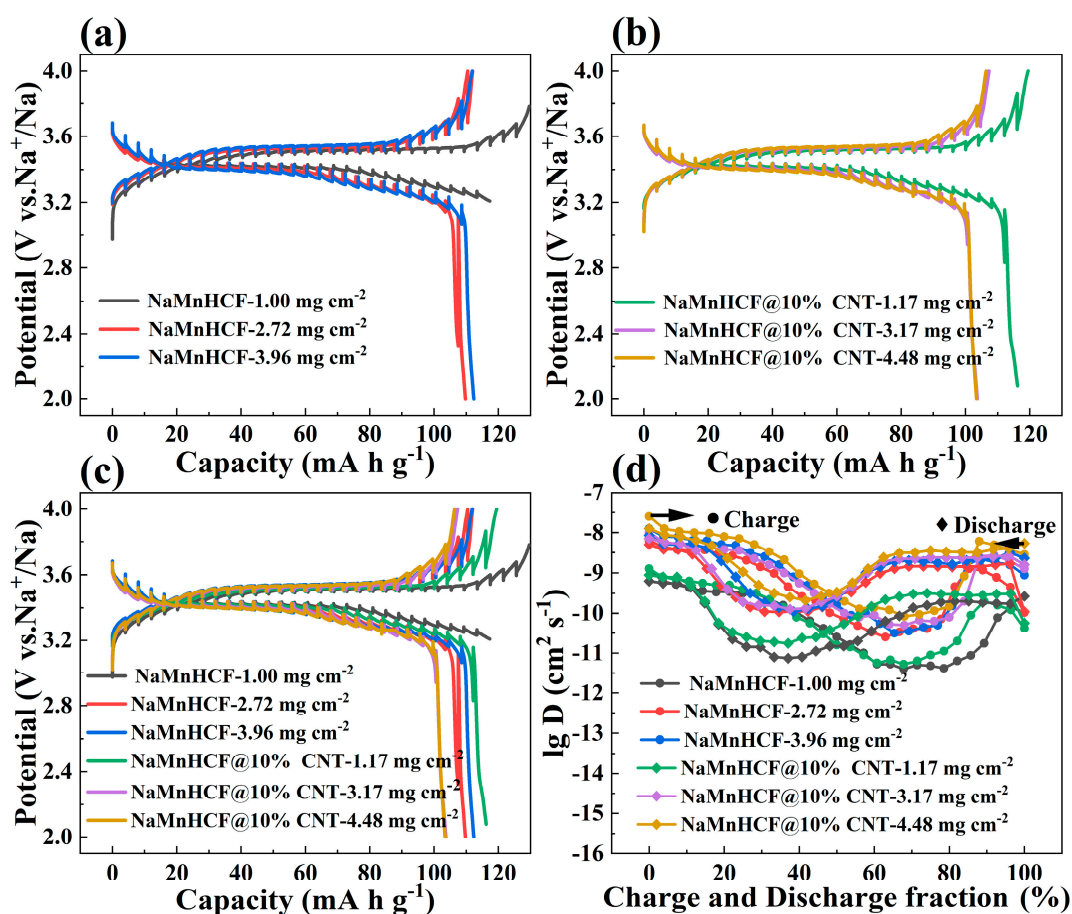

**Figure S10.** GITT curves of the half cells with different samples as cathode materials: (a) NaMnHCF different mass loadings, (b) NaMnHCF@10%CNT different mass loadings, (c) NaMnHCF and NaMnHCF@10%CNT different mass loadings and (d) Logarithm of the chemical diffusion coefficient of  $\text{Na}^+$  as a function of stoichiometry calculated from GITT.
